# Supplementary material
Source: publisher figshare collection journal article supplement (https://sage.figshare.com/ndownloader/files/17398601)
Supplement: Supplementary file 1 [file 17398601]

## Supplementary Figures

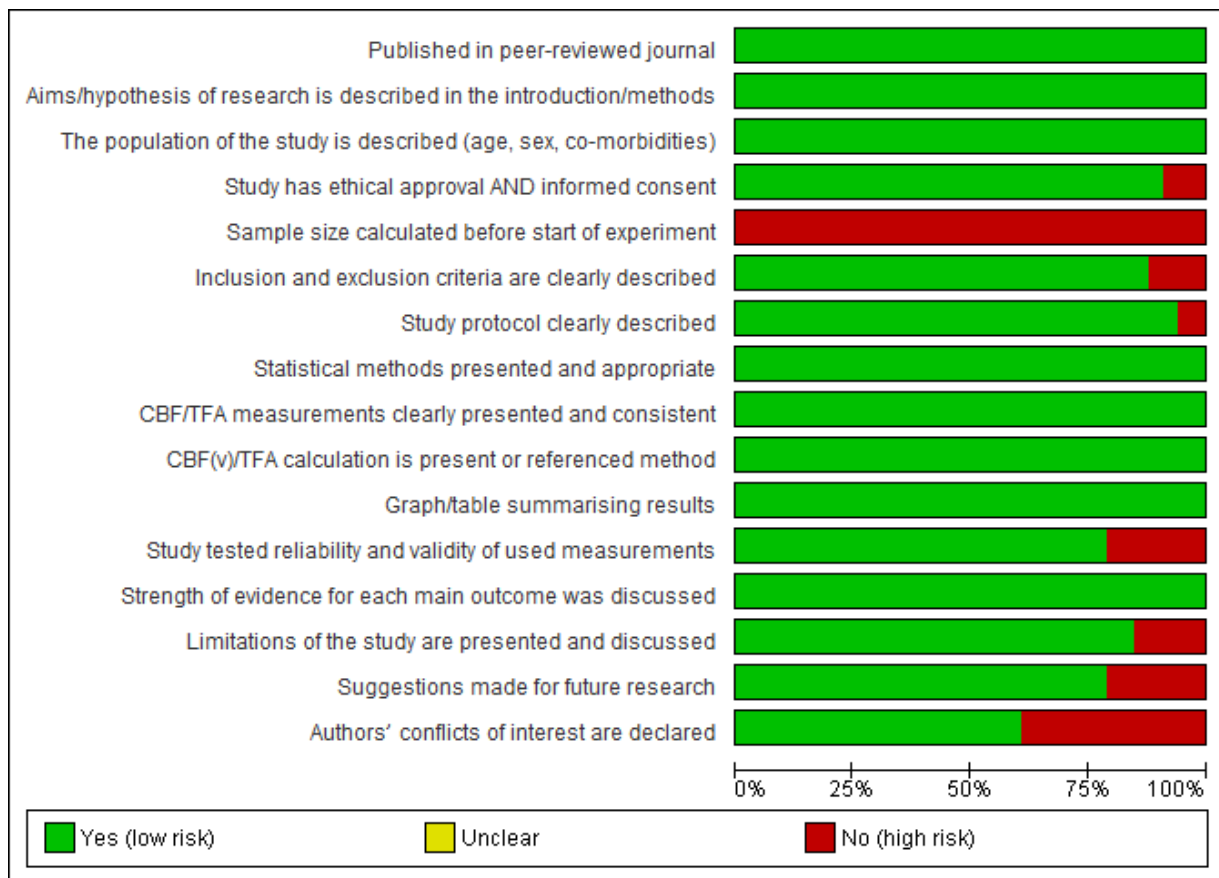

**Supplementary Figure I: authors' evaluation about each risk of bias item presented as percentages across all included studies for each of the Downs and Black criteria.**

|                                                                      | Atkin 2010 | Castro 2017(a) | Castro 2017(b) | Chen 2014 | Chi 2018 | Diehl 1995 | Fritsch 2010 | Gommer 2008 | Gong 2013 | Guo 2014 | Guo 2015 | Imrink 2005 | Kwan 2004 | Lang 2001 | Lmyd 2018 | Ma 2016 | Ma 2017 | Ma 2018 | Muller 2019 | Nakagawa 2011 | Oeinck 2013 | Ottle 2014 | Petersen 2015 | Reinhard 2005 | Reinhard 2008 | Reinhard 2012 | Saeed 2013 | Salinet 2014 | Salinet 2015 | Truijen 2018 | Tutaj 2014 | Wang 2015 | Xiong 2017 |
|----------------------------------------------------------------------|------------|----------------|----------------|-----------|----------|------------|--------------|-------------|-----------|----------|----------|-------------|-----------|-----------|-----------|---------|---------|---------|-------------|---------------|-------------|------------|---------------|---------------|---------------|---------------|------------|--------------|--------------|--------------|------------|-----------|------------|
| Published in peer-reviewed journal                                   | +          | +              | +              | +         | +        | +          | +            | +           | +         | +        | +        | +           | +         | +         | +         | +       | +       | +       | +           | +             | +           | +          | +             | +             | +             | +             | +          | +            | +            | +            | +          | +         | +          |
| Aims/hypothesis of research is described in the introduction/methods | +          | +              | +              | +         | +        | +          | +            | +           | +         | +        | +        | +           | +         | +         | +         | +       | +       | +       | +           | +             | +           | +          | +             | +             | +             | +             | +          | +            | +            | +            | +          | +         | +          |
| The population of the study is described (age, sex, co-morbidities)  | +          | +              | +              | +         | +        | +          | +            | +           | +         | +        | +        | +           | +         | +         | +         | +       | +       | +       | +           | +             | +           | +          | +             | +             | +             | +             | +          | +            | +            | +            | +          | +         | +          |
| Study has ethical approval AND informed consent                      | +          | +              | +              | +         | +        | +          | +            | +           | +         | +        | +        | +           | +         | +         | +         | +       | +       | +       | +           | +             | +           | +          | +             | +             | +             | +             | +          | +            | +            | +            | +          | +         | +          |
| Sample size calculated before start of experiment                    | +          | +              | +              | +         | +        | +          | +            | +           | +         | +        | +        | +           | +         | +         | +         | +       | +       | +       | +           | +             | +           | +          | +             | +             | +             | +             | +          | +            | +            | +            | +          | +         | +          |
| Inclusion and exclusion criteria are clearly described               | +          | +              | +              | +         | +        | +          | +            | +           | +         | +        | +        | +           | +         | +         | +         | +       | +       | +       | +           | +             | +           | +          | +             | +             | +             | +             | +          | +            | +            | +            | +          | +         | +          |
| Study protocol clearly described                                     | +          | +              | +              | +         | +        | +          | +            | +           | +         | +        | +        | +           | +         | +         | +         | +       | +       | +       | +           | +             | +           | +          | +             | +             | +             | +             | +          | +            | +            | +            | +          | +         | +          |
| Statistical methods presented and appropriate                        | +          | +              | +              | +         | +        | +          | +            | +           | +         | +        | +        | +           | +         | +         | +         | +       | +       | +       | +           | +             | +           | +          | +             | +             | +             | +             | +          | +            | +            | +            | +          | +         | +          |
| CBF/TFA measurements clearly presented and consistent                | +          | +              | +              | +         | +        | +          | +            | +           | +         | +        | +        | +           | +         | +         | +         | +       | +       | +       | +           | +             | +           | +          | +             | +             | +             | +             | +          | +            | +            | +            | +          | +         | +          |
| CBF(w)/TFA calculation is present or referenced method               | +          | +              | +              | +         | +        | +          | +            | +           | +         | +        | +        | +           | +         | +         | +         | +       | +       | +       | +           | +             | +           | +          | +             | +             | +             | +             | +          | +            | +            | +            | +          | +         | +          |
| Graph/table summarising results                                      | +          | +              | +              | +         | +        | +          | +            | +           | +         | +        | +        | +           | +         | +         | +         | +       | +       | +       | +           | +             | +           | +          | +             | +             | +             | +             | +          | +            | +            | +            | +          | +         | +          |
| Study tested reliability and validity of used measurements           | +          | +              | +              | +         | +        | +          | +            | +           | +         | +        | +        | +           | +         | +         | +         | +       | +       | +       | +           | +             | +           | +          | +             | +             | +             | +             | +          | +            | +            | +            | +          | +         | +          |
| Strength of evidence for each main outcome was discussed             | +          | +              | +              | +         | +        | +          | +            | +           | +         | +        | +        | +           | +         | +         | +         | +       | +       | +       | +           | +             | +           | +          | +             | +             | +             | +             | +          | +            | +            | +            | +          | +         | +          |
| Limitations of the study are presented and discussed                 | +          | +              | +              | +         | +        | +          | +            | +           | +         | +        | +        | +           | +         | +         | +         | +       | +       | +       | +           | +             | +           | +          | +             | +             | +             | +             | +          | +            | +            | +            | +          | +         | +          |
| Suggestions made for future research                                 | +          | +              | +              | +         | +        | +          | +            | +           | +         | +        | +        | +           | +         | +         | +         | +       | +       | +       | +           | +             | +           | +          | +             | +             | +             | +             | +          | +            | +            | +            | +          | +         | +          |
| Authors' conflicts of interest are declared                          | +          | +              | +              | +         | +        | +          | +            | +           | +         | +        | +        | +           | +         | +         | +         | +       | +       | +       | +           | +             | +           | +          | +             | +             | +             | +             | +          | +            | +            | +            | +          | +         | +          |

**Supplementary Figure II: review authors' evaluation about each risk of bias item for each included study of low risk of bias (green), and high risk of bias (red).**

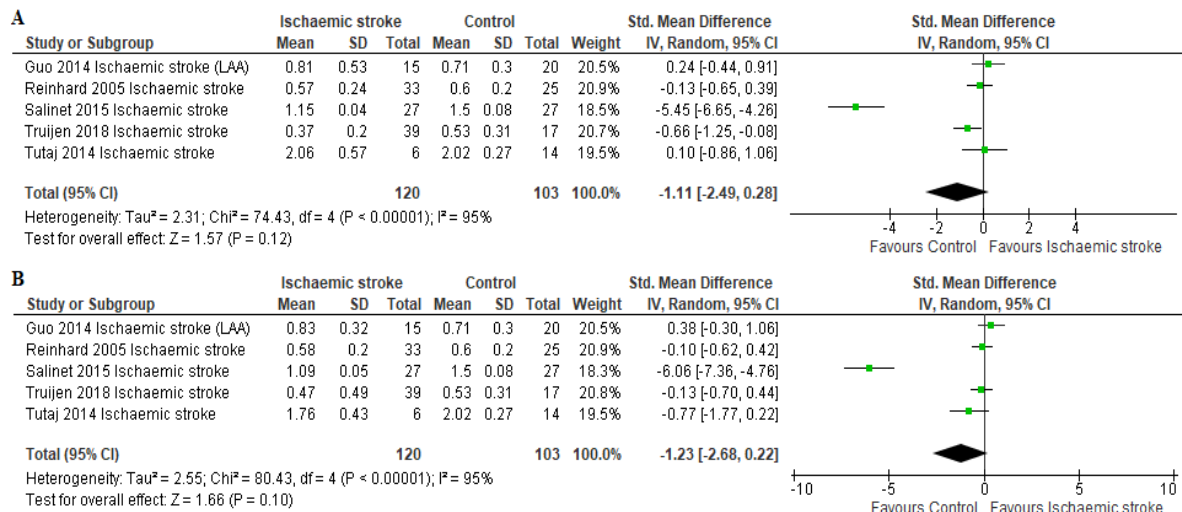

**Supplementary Figure III.** A: Forest plot of gain for a sub-group of large vessel disease (affected side) in five studies of AIS. Heterogeneity is high and significant ( $I^2 = 95\%$ ,  $P < 0.00001$ ). B: Gain for a sub-group of five studies in large vessel disease (unaffected side). Heterogeneity is high and also significant ( $I^2 = 95\%$ ,  $P < 0.00001$ ).

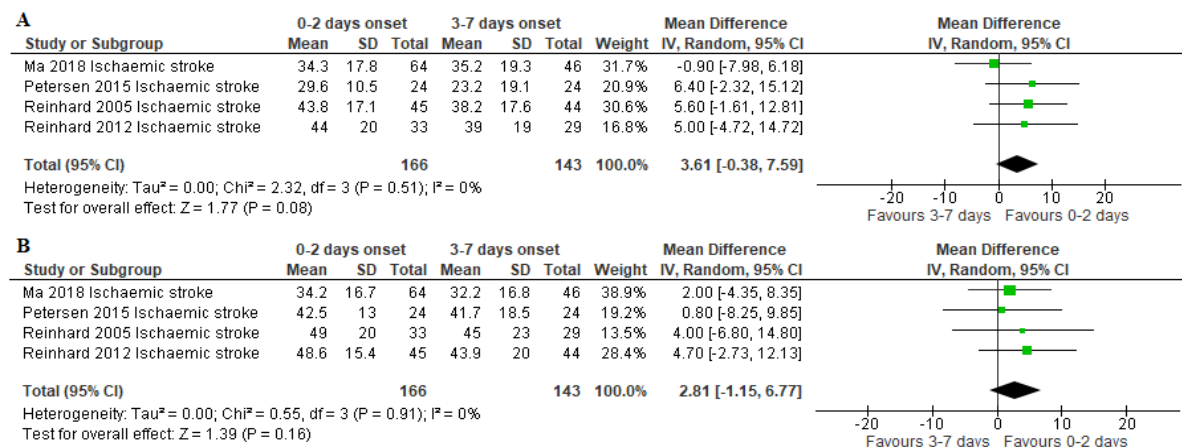

**Supplementary Figure IV.** A: Forest plot of phase for serial measurement in the affected side of AIS. Heterogeneity is low and non-significant ( $I^2 = 0\%$ ,  $P = 0.51$ ). B: Phase for serial measurement of four studies of AIS in the unaffected side. Heterogeneity is low and also non-significant ( $I^2 = 0\%$ ,  $P = 0.91$ ).
